# Supplementary material
Source: PubMed Central journal article supplement (PMC10036323)
Supplement: 41698_2023_371_MOESM1_ESM.pdf [file 41698_2023_371_MOESM1_ESM.pdf]

**a**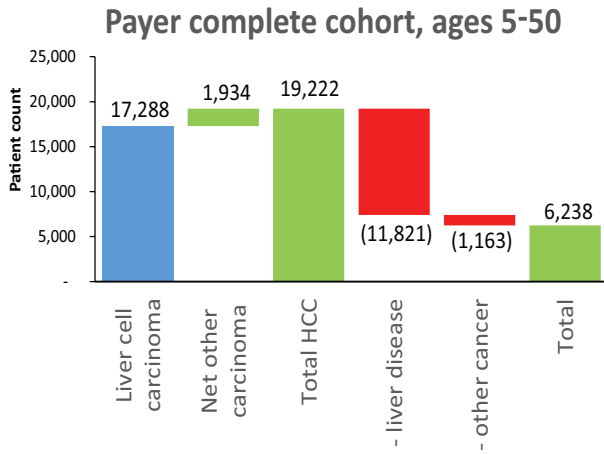**b**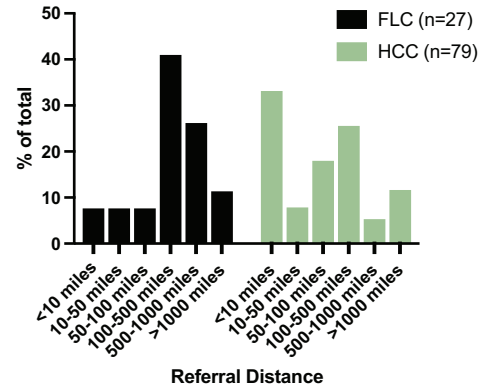

**Supplementary Figure 1. Supporting Data for inference of FLC incidence: A.** Step-by-step breakdown of the identification of the initial Liver Cancer cohort in the Komodo Health Care Map, showing cohort scale and changes. **B.** Distance from home zip code to UCSF for FLC patients and patients in HCC comparison cohort derived from ZIP3 data.

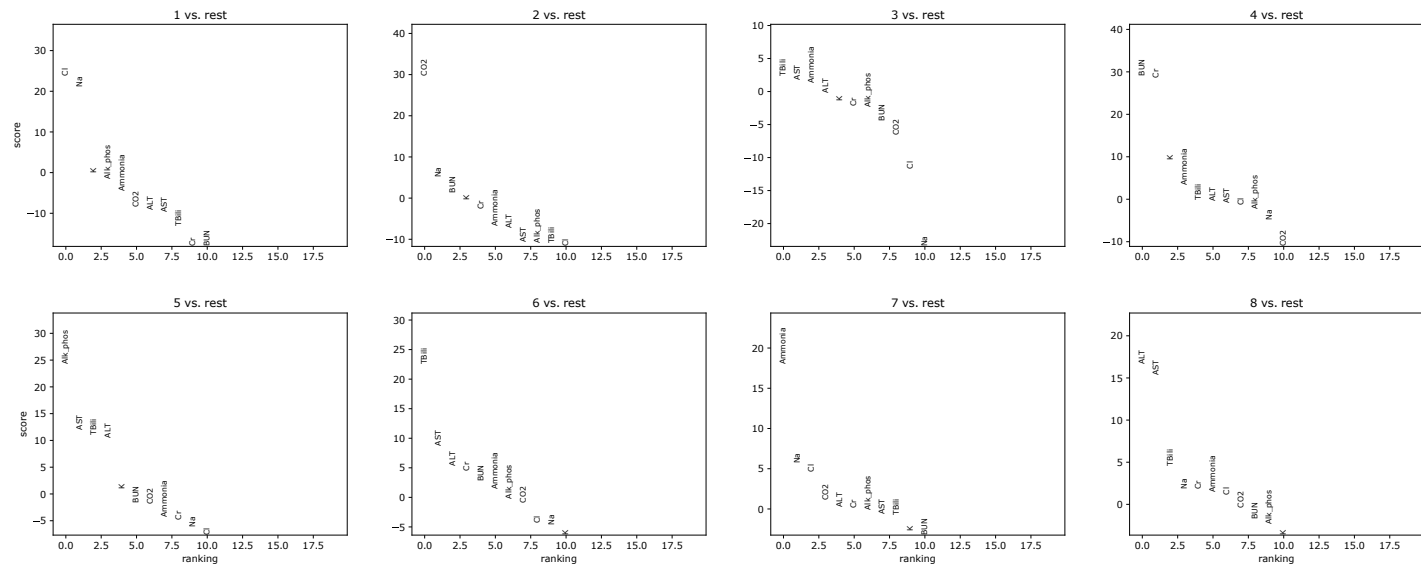

**Supplementary Figure 2. Lab-value enrichment within hyperammonemic patient clusters.** Lab value differences between clusters were evaluated in a 1 vs. rest Wilcoxon-rank-sum test using the scanpy function `rank_genes_test`. Y-axis indicates  $\log_{10}(\text{p-value})$  of difference between test group and rest, with higher absolute values representing significance, positive values indicating higher values in test group and negative numbers indicated lower values in test group
